# Supplementary material
Source: PubMed Central journal article supplement (PMC4979179)
Supplement: CVI.00148-16_zcd999095384so2.pdf [file CVI.00148-16_zcd999095384so2.pdf]

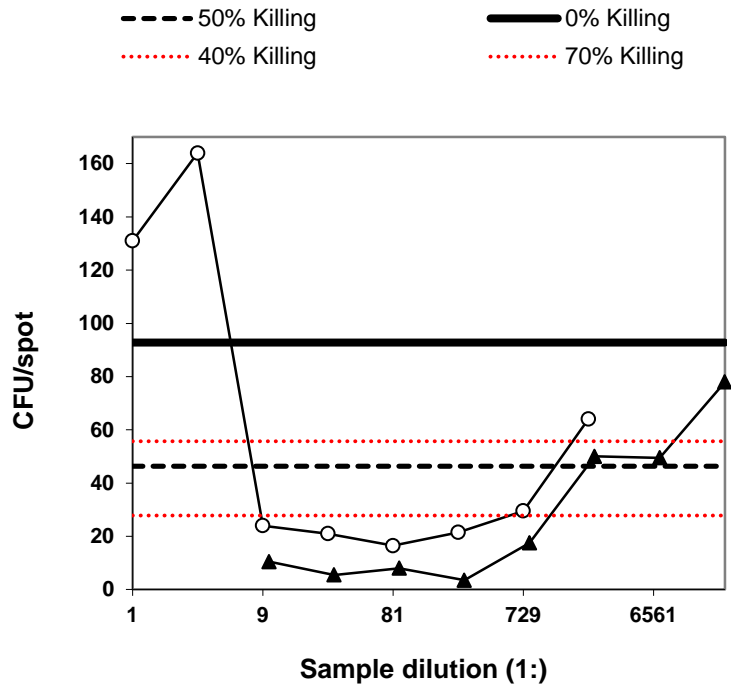

Fig. S2. Dilution of an IgM monoclonal antibody Hflex3a2 (X axis) and CFU of *S. flexneri* 3a (Y axis) in a BCA. Hflex3a2 was studied twice (Experiment 1 is open circle, experiment 2 is filled triangle). At neat and 1:3 dilution, Hflex3a2 did not kill target bacteria.
