# Supplementary material
Source: PubMed Central journal article supplement (PMC4979179)
Supplement: CVI.00148-16_zcd999095384so4.pdf [file CVI.00148-16_zcd999095384so4.pdf]

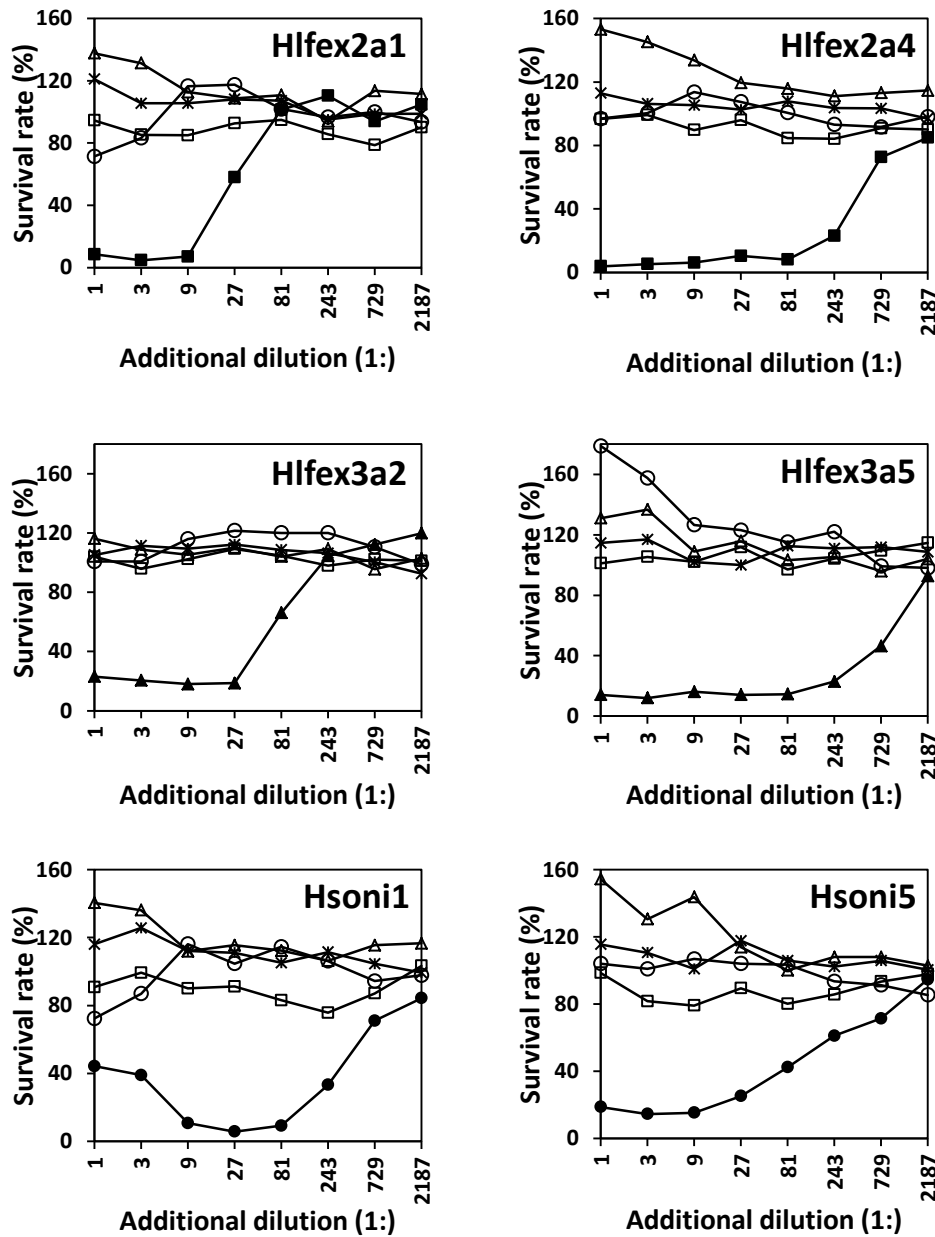

Fig. S4. Bactericidal assay results. Shown is the relative number of surviving target bacteria (Y axis) at various additional dilutions of a Mab (X axis). Names of each Mab used for the experiment were indicated in each panel. Target strains were *S. flexneri* 2a (solid square), *S. flexneri* 3a (solid triangle), *S. sonnei* (solid circle), *S. flexneri* 5a (open square), *S. dysenteriae* 1 (open triangle), *S. dysenteriae* 2 (open circle), and *S. boydii* (star).
